# Supplementary material for: Stereoselective degradation of aqueous endosulfan in modular estuarine mesocosms: formation of endosulfan γ-hydroxycarboxylate
Source: Royal Society of Chemistry journal article supplement (doi:10.1039/b212165d), 2003-01-01
Supplement: fig. s10.pdf [file fig.%20s10.pdf]

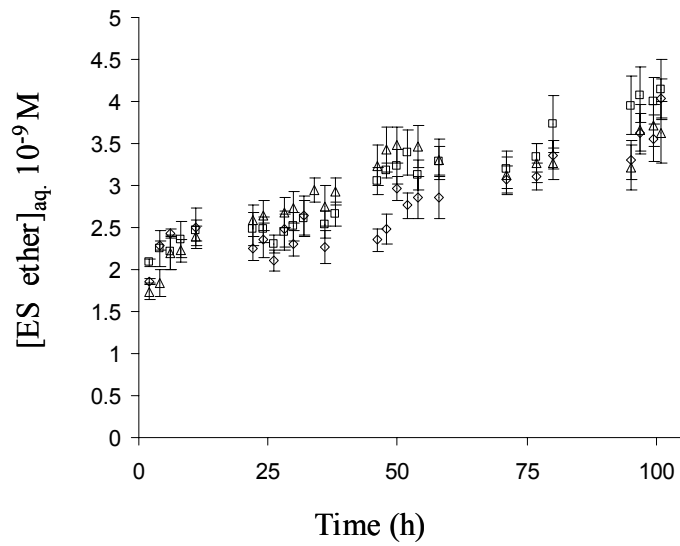

**Sup. Figure 10.**  $[ES\ ether]_{aq.}$  in modular estuarine mesocosms:  $\beta$ -ES trt. ( $\square$ ),  $\alpha$ -ES trt. ( $\triangle$ ), Tech.-ES trt. ( $\diamond$ ).
