# Supplementary material for: Stereoselective degradation of aqueous endosulfan in modular estuarine mesocosms: formation of endosulfan γ-hydroxycarboxylate
Source: Royal Society of Chemistry journal article supplement (doi:10.1039/b212165d), 2003-01-01
Supplement: table s1.pdf [file table%20s1.pdf]

| <b>Analyte</b>                            | <b>R<sub>T</sub>- STD (min)<br/>GC-ECD</b> | <b>R<sub>T</sub>- EXP (min)<br/>GC-ECD</b> |
|-------------------------------------------|--------------------------------------------|--------------------------------------------|
| <b>4-bromoanisole<br/>(internal std.)</b> | 3.45 ± 0.02                                | 3.45 ± 0.03                                |
| <b>ES ether</b>                           | 10.33 ± 0.01                               | 10.31 ± 0.03                               |
| <b>ES α-hydroxyether</b>                  | 11.79 ± 0.03                               | 11.76 ± 0.04                               |
| <b>ES lactone</b>                         | 11.96 ± 0.03                               | 11.98 ± 0.03                               |
| <b>α-ES</b>                               | 13.06 ± 0.02                               | 13.05 ± 0.02                               |
| <b>ES diol</b>                            | 13.69 ± 0.03                               | 13.68 ± 0.04                               |
| <b>β-ES</b>                               | 13.92 ± 0.02                               | 13.92 ± 0.02                               |
| <b>ES sulfate</b>                         | 14.65 ± 0.02                               | 14.64 ± 0.03                               |

| <b>Analyte</b>                            | <b>R<sub>T</sub>- STD (min)<br/>GC-ITMS</b> | <b>R<sub>T</sub>- EXP (min)<br/>GC-ITMS</b> |
|-------------------------------------------|---------------------------------------------|---------------------------------------------|
| <b>4-bromoanisole<br/>(internal std.)</b> | 4.95 ± 0.01                                 | 4.94 ± 0.02                                 |
| <b>ES ether</b>                           | 8.92 ± 0.03                                 | 8.90 ± 0.03                                 |
| <b>ES α-hydroxyether</b>                  | 10.89 ± 0.02                                | 10.89 ± 0.03                                |
| <b>ES lactone</b>                         | 11.45 ± 0.03                                | 11.44 ± 0.02                                |
| <b>α-ES</b>                               | 12.68 ± 0.02                                | 12.69 ± 0.02                                |
| <b>ES diol</b>                            | 14.28 ± 0.03                                | 14.26 ± 0.03                                |
| <b>β-ES</b>                               | 14.45 ± 0.01                                | 14.46 ± 0.02                                |
| <b>ES sulfate</b>                         | 15.72 ± 0.01                                | 15.72 ± 0.03                                |

**Sup. Table 1.** GC-ECD and GC-ITMS retention times, R<sub>T</sub>, of endosulfan analytes.
