# Supplementary figures and images for: Stereoselective degradation of aqueous endosulfan in modular estuarine mesocosms: formation of endosulfan γ-hydroxycarboxylate
Source: Royal Society of Chemistry journal article supplement (doi:10.1039/b212165d), 2003-01-01

## Sup. Figure 2 $\alpha$ -ES

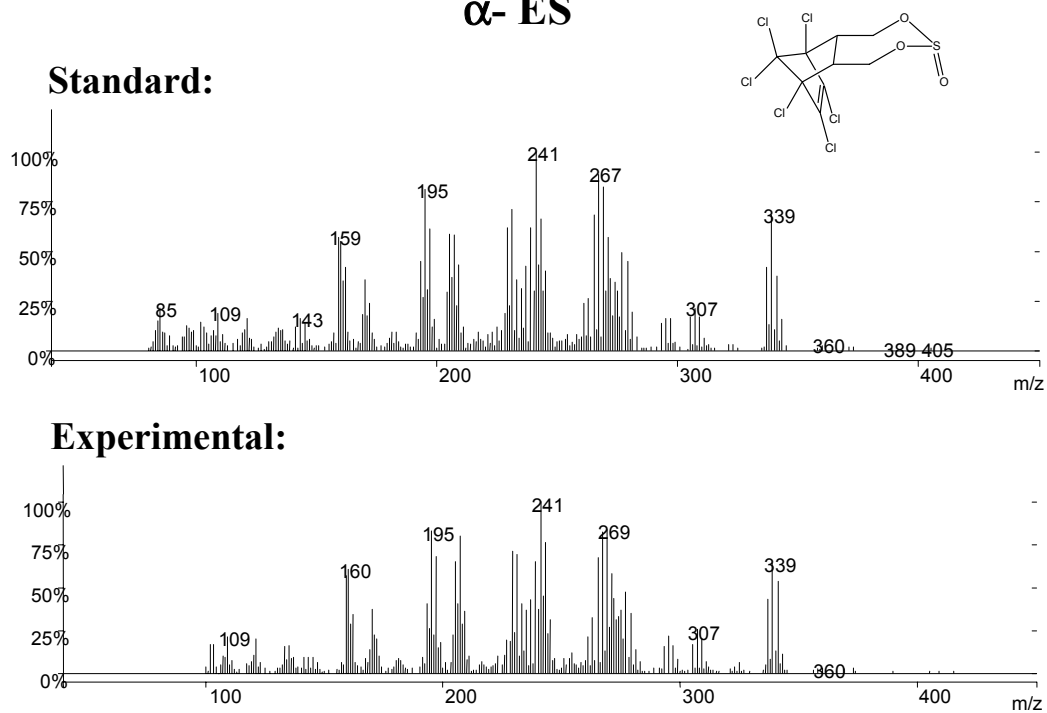

Sup. Figure 2. Mass spectra of  $\alpha$ -ES

Supplement: fig. s2.pdf [file fig.%20s2.pdf]

### Sup. Figure 4 ES diol

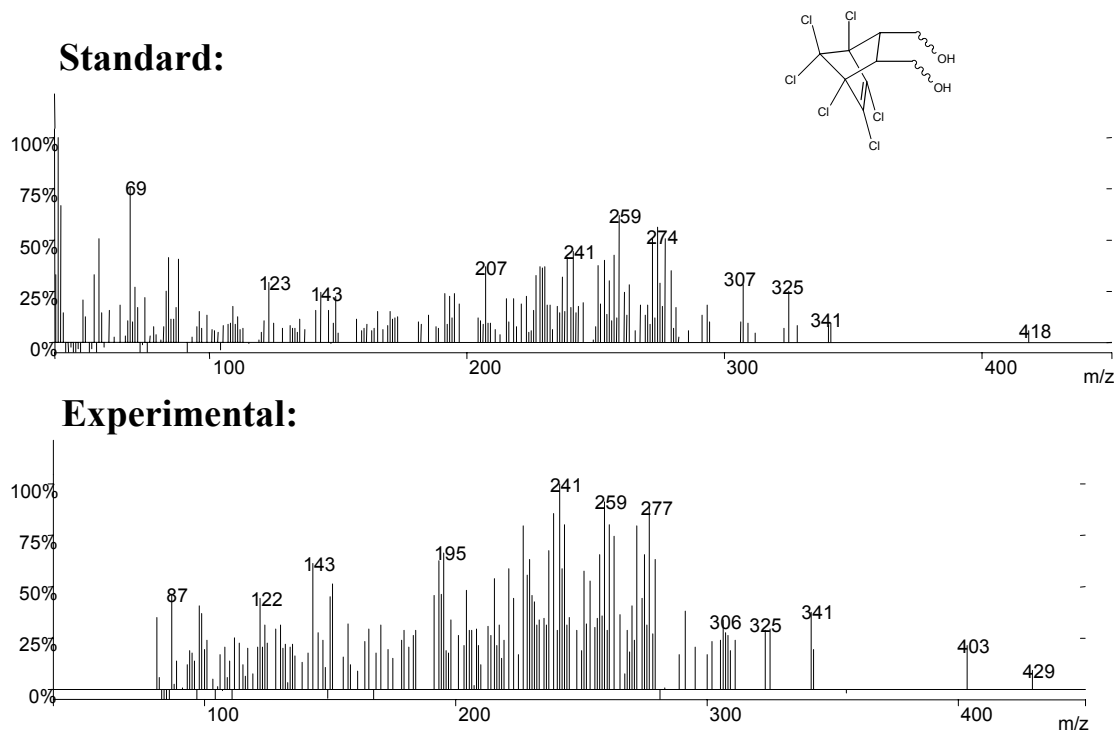

Sup. Figure 4. Mass spectra of ES diol.

Supplement: fig. s4.pdf [file fig.%20s4.pdf]
